# Supplementary material for: Cesarean delivery on child health and development in Japanese nationwide birth cohort
Source: Springer Nature journal article supplement (doi:10.1038/s41598-025-87043-2), 2025-01-20
Supplement: MOESM1 [file 41598_2025_87043_MOESM1_ESM.pdf]

## **Supplementary materials**

### **Cesarean Delivery and Child Health and Development: Nationwide birth cohort in Japan**

Naomi Matsumoto\*, MD, PhD<sup>1</sup>; Takashi Mitsui, MD, PhD<sup>2</sup>; Kei Tamai, MD, PhD<sup>3</sup>; Tomoya Hirota, MD, PhD<sup>4</sup>; Hisashi Masuyama, MD, PhD<sup>2</sup>; Takashi Yorifuji, MD, PhD<sup>1</sup>

#### **Affiliations:**

<sup>1</sup> Department of Epidemiology, Faculty of Medicine, Dentistry and Pharmaceutical Sciences, Okayama University, Okayama, Japan

<sup>2</sup> Department of Obstetrics and Gynecology, Okayama University Graduate School of Medicine, Okayama, Japan

<sup>3</sup> Division of Neonatology, NHO Okayama Medical Center, Okayama, Japan

<sup>4</sup> Department of Psychiatry and Behavioral Sciences, UCSF Weill Institute for Neurosciences, University of California San Francisco, San Francisco

#### **eMethod. Descriptions of Exposure and Outcomes**

**Table S1. Questionnaires for Assessing Developmental Milestones and Behavioral Indicators**

**Table S2. Characteristics of Participants Who Were Lost to Follow-up**

**Table S3. The detailed numbers and percentages of the evaluated outcomes**

**Figure S1. Adjusted risk ratios for preterm child health and developmental outcomes associated with cesarean section versus vaginal delivery, with 95% confidence intervals.**

**Table S4. Proportions of Each Outcome among Children Analyzed and All Children with mothers aged over 25 years included in 2010 Cohort**

## **eMethod. Descriptions of Exposure and Outcomes**

This section provides comprehensive definitions and measurement methods for the primary exposure (mode of delivery) and all outcomes examined in this study, including hospitalizations, metabolic status, and developmental milestones.

### *Information on delivery methods*

The PRN database categorizes delivery methods into six choices: “natural vaginal,” “suction,” “forceps,” “scheduled cesarean,” “emergency cesarean,” and “other.” Of these, those who selected “scheduled cesarean” or “emergency cesarean” were defined as the cesarean section group, whereas those who chose “natural vaginal,” “suction,” or “forceps” were classified as the vaginal delivery group.

### *Information on child health outcomes*

#### Preschool hospitalizations

In the Longitudinal Survey of Babies in the 21<sup>st</sup> Century, parents were queried annually about whether their children had been admitted to the hospital for treatment in the previous year and the reason for admission. The preschool hospitalization group consisted of children who experienced at least one admission for any reason between the ages of 1.5 and 5.5 years based on information from the second through sixth surveys. Additionally, we defined the preschool respiratory infection hospitalization group as consisting of children who were hospitalized at least once during the same period for respiratory tract infections. We defined the preschool gastrointestinal tract illness hospitalization group as children who were hospitalized at least once during the same period for gastroenteritis or other gastrointestinal tract illnesses excluding intestinal intussusception. The

frequency of hospitalization in each period was not assessed in this survey.

### Metabolic status

BMI standard deviation scores were computed using anthropometric data collected at 5.5 and 9 years of age in accordance with the World Health Organization's established criteria. The participants were stratified into the following categories based on their BMI standard deviation scores: underweight ( $< -1.5$ ), normal weight ( $-1.5$  to  $1.5$ ), overweight ( $1.5$  to  $2.5$ ), and obese ( $\geq 2.5$ ). To minimize the potential impact of outliers, the children who exhibited BMI standard deviation scores less than  $-5$  at 5.5 years ( $n = 4$ , comprising three vaginal deliveries and one cesarean section) and 9 years ( $n = 1$ , one vaginal delivery) were excluded from the analysis of weight status. For this investigation, the overweight and obese categories were consolidated into a single obese group.

### Developmental milestones

The Longitudinal Survey of Babies in the 21<sup>st</sup> Century incorporates a comprehensive assessment of child development across multiple domains and time points. The responses for all of the child development items are dichotomized (“Yes” and “No”). Two board-certified experts, a pediatrician (NM) and a child psychiatrist specializing in child development (TH), meticulously evaluated and classified each survey item into the following developmental domains (Table S1): motor milestones (4 items) at age 2.5 years, language milestones (3 items) at age 2.5 years, cognitive milestones (1 item) at age 5.5 years, self-regulation (2 items) at age 5.5 years, social-emotional milestones (3 items) at age 5.5 years, attention (scale: 1 item) at age 8 years, adaptive skills (3 items) at age 8 years, and conduct problems (3 items) at age 8 years. Failure to achieve any single item within a domain was considered as not having achieved development in that domain.

The delineation of these developmental domains was established through a consensus between the aforementioned experts and drew upon milestone assessments from the Centers for Disease Control and Prevention; the Behavioral Assessment System for Children, Third Edition; and the Strengths and Difficulties Questionnaire. The operational definitions of the domains and their constituent items were subsequently reviewed and approved by an additional pediatric physician (TY).

Comprehensive details regarding the specific assessment items and the computational methods that were employed for the milestones and scales are provided in Table S1.

Table S1. Questionnaires for Assessing Developmental Milestones and Behavioral Indicators

| Questionnaires                                                                                                            | Developmental milestones    | Reference                      |
|---------------------------------------------------------------------------------------------------------------------------|-----------------------------|--------------------------------|
| The following items were selected as "yes" or "no" in the survey at 2.5 years of age                                      |                             |                                |
| Can your child walk?                                                                                                      | Motor milestone             | CDC                            |
| Can your child run?                                                                                                       | Motor milestone             | CDC                            |
| Can your child climb stairs?                                                                                              | Motor milestone             | CDC                            |
| Can your child use a spoon (fork) for self-feeding?                                                                       | Motor milestone             | CDC                            |
| Can your child say words with meaning?                                                                                    | Language milestone          | Expert opinion referred to CDC |
| Can your child compose two-phrase sentences?                                                                              | Language milestone          | CDC                            |
| Can your child say his or her own name?                                                                                   | Language milestone          | CDC                            |
| The following items were selected as "can" or "cannot" in the survey at 5.5 years of age                                  |                             |                                |
| Focusing on one thing                                                                                                     | Cognitive milestones        | CDC                            |
| Expressing emotions appropriately                                                                                         | Social-emotional milestones | Expert opinion                 |
| Acting in a group                                                                                                         | Social-emotional milestones | Expert opinion                 |
| Keeping promises                                                                                                          | Social-emotional milestones | CDC                            |
| Listening calmly                                                                                                          | Self-regulation             | Expert opinion                 |
| Enduring or tolerating                                                                                                    | Self-regulation             | Expert opinion                 |
| The following behavioral indicators were selected as "has acquired" or "has not acquired" in the survey at 8 years of age |                             |                                |
| Listens to the end of what others say                                                                                     | Attention problem           | BASC3 (PRS)                    |
| Greets and responds to others                                                                                             | Adaptive skills             | BASC3 (PRS)                    |
| Always looks right and left when crossing the road                                                                        | Adaptive skills             | BASC3 (PRS)                    |
| Does not follow strangers                                                                                                 | Adaptive skills             | BASC3 (PRS)                    |
| Does not tell a lie                                                                                                       | Conduct problem             | SDQ_18/BASC3 (PRS)             |
| Does not break toys or books                                                                                              | Conduct problem             | BASC3/CBCL                     |
| Is not violent to others                                                                                                  | Conduct problem             | SDQ_18/BASC3 (PRS)             |

CDC: Centers for Disease Control and Prevention,

BASC3 (PRS): Behavior Assessment System for Children, Third Edition, Parent Rating Scales,

SDQ: Strengths and Difficulties Questionnaire,

CBCL: Child Behavior Checklist.

Table S2. Characteristics of Participants Who Were Lost to Follow-up

|                                               | Analyzed<br>(n=1,233) | Lost to follow up<br>(n=894) | Total<br>(N=2,114) |
|-----------------------------------------------|-----------------------|------------------------------|--------------------|
| Mode of delivery                              |                       |                              |                    |
| Vaginal delivery                              | 783 (63.5%)           | 568 (64.5%)                  | 1,351 (63.9%)      |
| Cesarean section                              | 450 (36.5%)           | 313 (35.5%)                  | 763 (36.1%)        |
| Gestational week*                             | 38.05 (2.48)          | 37.83 (2.67)                 | 37.96 (2.56)       |
| Birth weight (g)*                             | 2821.48 (562.77)      | 2809.09 (605.18)             | 2816.32 (580.71)   |
| Low birth weight < 2500g                      | 269 (21.8%)           | 202 (22.9%)                  | 471 (22.3%)        |
| Small for gestational age                     | 70 (5.7%)             | 51 (5.8%)                    | 121 (5.7%)         |
| Multiple births                               | 83 (6.7%)             | 66 (7.5%)                    | 149 (7.0%)         |
| Neonatal asphyxia                             |                       |                              |                    |
| No                                            | 1,188 (97.0%)         | 846 (96.6%)                  | 2,034 (96.8%)      |
| Mild neonatal asphyxia                        | 34 (2.8%)             | 25 (2.9%)                    | 59 (2.8%)          |
| Severe neonatal asphyxia                      | 3 (0.2%)              | 5 (0.6%)                     | 8 (0.4%)           |
| Maternal transfer                             |                       |                              |                    |
| No                                            | 1,052 (85.3%)         | 732 (83.1%)                  | 1,784 (84.4%)      |
| Yes (emergent)                                | 73 (5.9%)             | 61 (6.9%)                    | 134 (6.3%)         |
| Yes (non-urgent)                              | 108 (8.8%)            | 88 (10.0%)                   | 196 (9.3%)         |
| Parity                                        |                       |                              |                    |
| Primipara                                     | 654 (53.3%)           | 458 (52.5%)                  | 1,112 (53.0%)      |
| Multipara                                     | 573 (46.7%)           | 415 (47.5%)                  | 988 (47.0%)        |
| Maternal underlying conditions                | 392 (31.8%)           | 268 (30.4%)                  | 660 (31.2%)        |
| <i>in-vitro</i> fertilization                 | 79 (6.4%)             | 37 (4.2%)                    | 116 (5.5%)         |
| Position                                      |                       |                              |                    |
| Cephalic presentation                         | 1,134 (92.0%)         | 821 (93.2%)                  | 1,955 (92.5%)      |
| Breech presentation                           | 99 (8.0%)             | 60 (6.8%)                    | 159 (7.5%)         |
| Pregnancy complications                       | 731 (59.3%)           | 499 (56.6%)                  | 1,230 (58.2%)      |
| Prenatal fetal anomalies                      | 99 (8.0%)             | 64 (7.3%)                    | 163 (7.7%)         |
| Maternal smoking during pregnancy             | 24 (2.6%)             | 57 (8.8%)                    | 81 (5.1%)          |
| Maternal alcohol consumption during pregnancy | 35 (3.8%)             | 26 (4.0%)                    | 61 (3.9%)          |
| Maternal age at delivery                      |                       |                              |                    |
| <30                                           | 295 (23.9%)           | 339 (38.5%)                  | 634 (30.0%)        |
| 30~34                                         | 448 (36.3%)           | 302 (34.3%)                  | 750 (35.5%)        |
| 35~                                           | 490 (39.7%)           | 240 (27.2%)                  | 730 (34.5%)        |
| Paternal age at delivery                      |                       |                              |                    |
| <30                                           | 227 (18.6%)           | 246 (29.3%)                  | 473 (22.9%)        |
| 30~34                                         | 372 (30.4%)           | 253 (30.2%)                  | 625 (30.3%)        |
| 35~                                           | 624 (51.0%)           | 340 (40.5%)                  | 964 (46.8%)        |
| Maternal education attainment                 |                       |                              |                    |
| Bachelor's degree or higher                   | 399 (33.3%)           | 166 (25.6%)                  | 565 (30.6%)        |
| Vocational school/junior college graduate     | 523 (43.6%)           | 268 (41.4%)                  | 791 (42.8%)        |
| High school graduate or below                 | 277 (23.1%)           | 214 (33.0%)                  | 491 (26.6%)        |
| Paternal education attainment                 |                       |                              |                    |
| Bachelor's degree or higher                   | 686 (57.7%)           | 284 (45.2%)                  | 970 (53.4%)        |
| Vocational school/junior college graduate     | 178 (15.0%)           | 111 (17.7%)                  | 289 (15.9%)        |
| High school graduate or below                 | 325 (27.3%)           | 233 (37.1%)                  | 558 (30.7%)        |
| Place of residence at birth                   |                       |                              |                    |
| Special ward or designated city               | 532 (43.1%)           | 376 (42.7%)                  | 908 (43.0%)        |
| City                                          | 638 (51.7%)           | 443 (50.3%)                  | 1,081 (51.1%)      |
| Town or village                               | 63 (5.1%)             | 62 (7.0%)                    | 125 (5.9%)         |

Categorical variables were described by number (%), and continuous variables\* were described by mean (standardized deviation).

Table S3. The detailed numbers and percentages of the evaluated outcomes

|                                                                           | Vaginal delivery<br>(n=1,351) | Delivery method<br>Cesarean section<br>(n=763) | All<br>(N=2,114) |
|---------------------------------------------------------------------------|-------------------------------|------------------------------------------------|------------------|
| Hospitalization for any reason                                            |                               |                                                |                  |
| No                                                                        | 964 (78.3%)                   | 512 (73.4%)                                    | 1,476 (76.5%)    |
| Yes                                                                       | 267 (21.7%)                   | 186 (26.6%)                                    | 453 (23.5%)      |
| Hospitalization for respiratory infection                                 |                               |                                                |                  |
| No                                                                        | 1,115 (90.6%)                 | 621 (89.0%)                                    | 1,736 (90.0%)    |
| Yes                                                                       | 116 (9.4%)                    | 77 (11.0%)                                     | 193 (10.0%)      |
| Hospitalization for gastrointestinal disease                              |                               |                                                |                  |
| No                                                                        | 1,197 (97.2%)                 | 675 (96.7%)                                    | 1,872 (97.0%)    |
| Yes                                                                       | 34 (2.8%)                     | 23 (3.3%)                                      | 57 (3.0%)        |
| Overweight or obesity (5.5 years)                                         |                               |                                                |                  |
| No                                                                        | 823 (90.8%)                   | 456 (90.1%)                                    | 1,279 (90.6%)    |
| Yes                                                                       | 83 (9.2%)                     | 50 (9.9%)                                      | 133 (9.4%)       |
| Overweight or obesity (9 years)                                           |                               |                                                |                  |
| No                                                                        | 689 (88.0%)                   | 394 (87.6%)                                    | 1,083 (87.8%)    |
| Yes                                                                       | 94 (12.0%)                    | 56 (12.4%)                                     | 150 (12.2%)      |
| Motor milestones not attained by the expected time (2.5 years)            |                               |                                                |                  |
| 0                                                                         | 1,089 (95.5%)                 | 598 (93.3%)                                    | 1,687 (94.7%)    |
| 1                                                                         | 31 (2.7%)                     | 29 (4.5%)                                      | 60 (3.4%)        |
| 2                                                                         | 6 (0.5%)                      | 2 (0.3%)                                       | 8 (0.4%)         |
| 3                                                                         | 6 (0.5%)                      | 6 (0.9%)                                       | 12 (0.7%)        |
| 4                                                                         | 8 (0.7%)                      | 6 (0.9%)                                       | 14 (0.8%)        |
| Language milestones not attained by the expected time (2.5 years)         |                               |                                                |                  |
| 0                                                                         | 968 (84.9%)                   | 517 (80.9%)                                    | 1,485 (83.5%)    |
| 1                                                                         | 88 (7.7%)                     | 77 (12.1%)                                     | 165 (9.3%)       |
| 2                                                                         | 64 (5.6%)                     | 29 (4.5%)                                      | 93 (5.2%)        |
| 3                                                                         | 20 (1.8%)                     | 16 (2.5%)                                      | 36 (2.0%)        |
| Cognitive milestones not attained by the expected time (5.5 years)        |                               |                                                |                  |
| 0                                                                         | 917 (91.9%)                   | 511 (91.6%)                                    | 1,428 (91.8%)    |
| 1                                                                         | 81 (8.1%)                     | 47 (8.4%)                                      | 128 (8.2%)       |
| Self-regulation problem (5.5 years)                                       |                               |                                                |                  |
| 0                                                                         | 870 (87.3%)                   | 484 (86.9%)                                    | 1,354 (87.2%)    |
| 1                                                                         | 98 (9.8%)                     | 57 (10.2%)                                     | 155 (10.0%)      |
| 2                                                                         | 28 (2.8%)                     | 16 (2.9%)                                      | 44 (2.8%)        |
| Social-emotional milestones not attained by the expected time (5.5 years) |                               |                                                |                  |
| 0                                                                         | 851 (85.4%)                   | 473 (84.9%)                                    | 1,324 (85.2%)    |
| 1                                                                         | 106 (10.6%)                   | 61 (11.0%)                                     | 167 (10.7%)      |
| 2                                                                         | 25 (2.5%)                     | 13 (2.3%)                                      | 38 (2.4%)        |
| 3                                                                         | 15 (1.5%)                     | 10 (1.8%)                                      | 25 (1.6%)        |
| Attention problem (8 years)                                               |                               |                                                |                  |
| 0                                                                         | 721 (82.0%)                   | 351 (73.6%)                                    | 1,072 (79.1%)    |
| 1                                                                         | 158 (18.0%)                   | 126 (26.4%)                                    | 284 (20.9%)      |
| Adaptive problem (8 years)                                                |                               |                                                |                  |
| 0                                                                         | 606 (69.7%)                   | 284 (60.4%)                                    | 890 (66.4%)      |
| 1                                                                         | 202 (23.2%)                   | 155 (33.0%)                                    | 357 (26.6%)      |
| 2                                                                         | 55 (6.3%)                     | 25 (5.3%)                                      | 80 (6.0%)        |
| 3                                                                         | 7 (0.8%)                      | 6 (1.3%)                                       | 13 (1.0%)        |
| Conduct problem (8 years)                                                 |                               |                                                |                  |
| 0                                                                         | 587 (67.4%)                   | 309 (65.1%)                                    | 896 (66.6%)      |
| 1                                                                         | 206 (23.7%)                   | 109 (22.9%)                                    | 315 (23.4%)      |
| 2                                                                         | 59 (6.8%)                     | 45 (9.5%)                                      | 104 (7.7%)       |
| 3                                                                         | 19 (2.2%)                     | 12 (2.5%)                                      | 31 (2.3%)        |

For detailed definitions of each developmental milestone, please refer to Table S1.

**Figure S1.**

**A. Health outcomes**

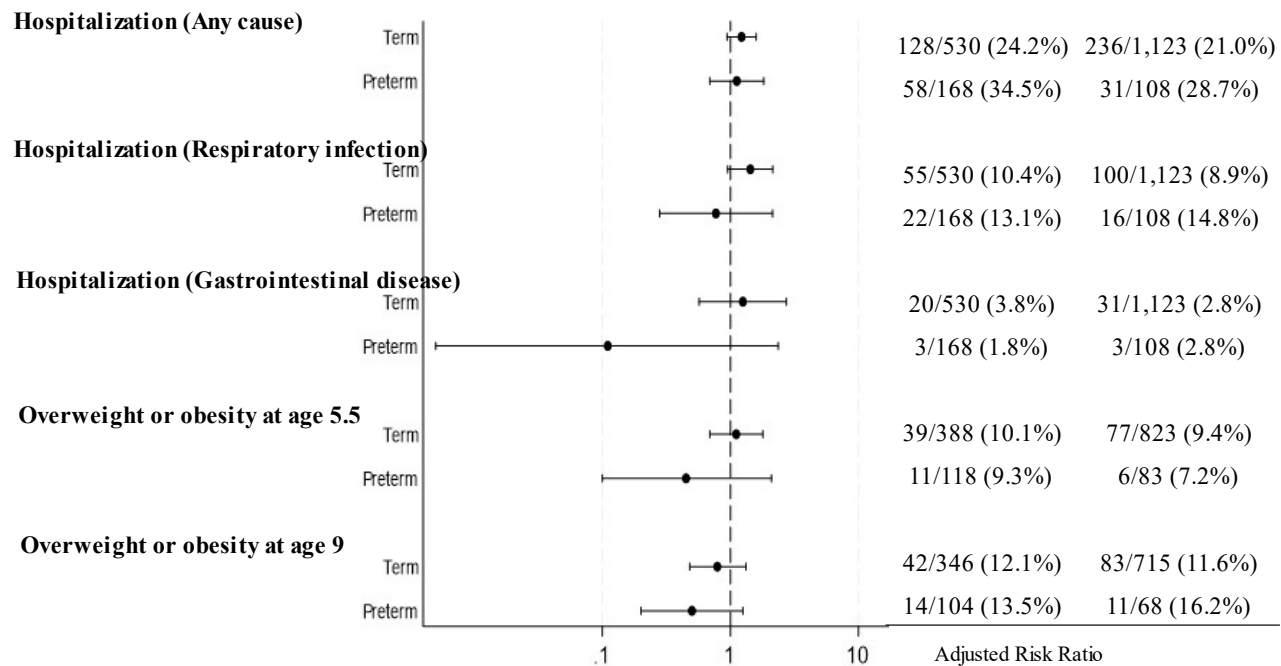

**B. Developmental outcomes**

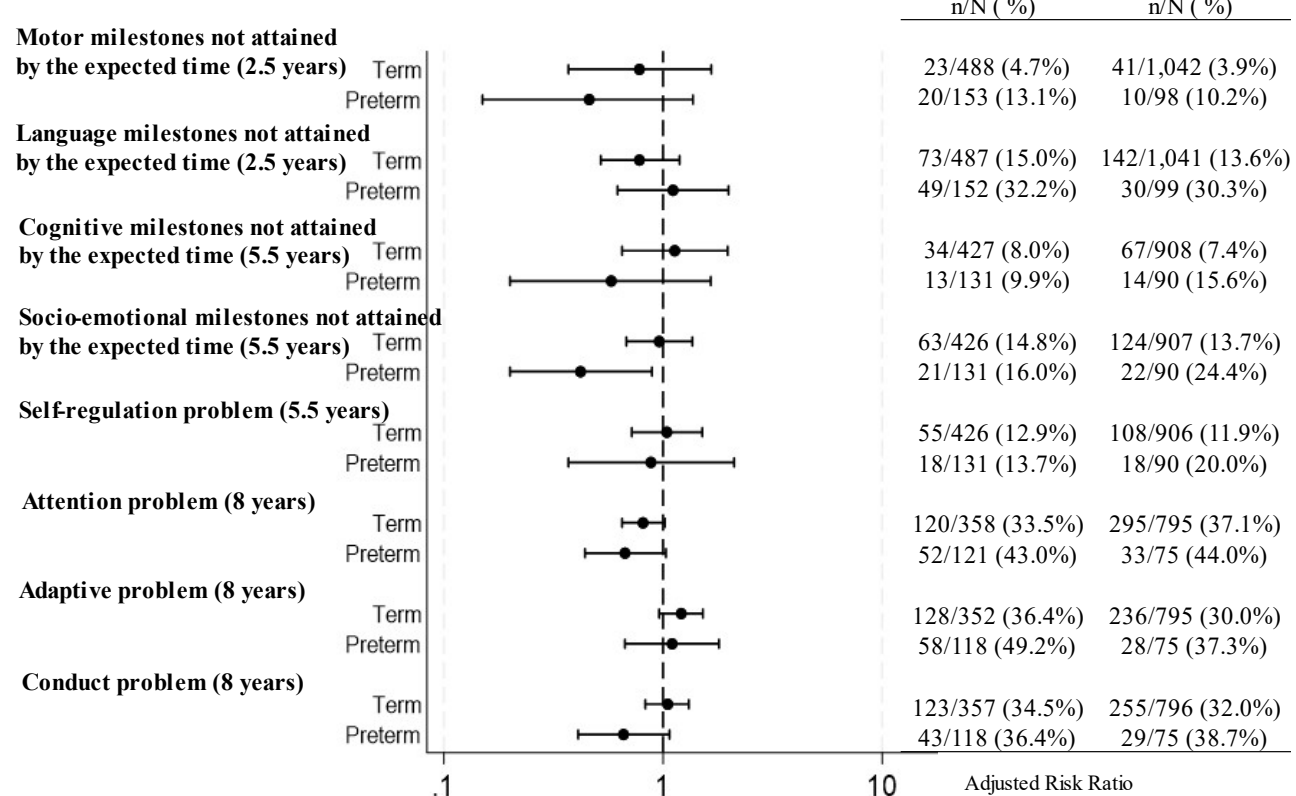

Figure S1. Adjusted risk ratios for multiple child health and developmental outcomes associated with cesarean section versus vaginal delivery, stratified by preterm birth status, with 95% confidence intervals. Each outcome was analyzed separately. Adjusted for maternal age at delivery, parity, multiple births, prenatal fetal anomalies, presentation, maternal transfer status, maternal underlying diseases, pregnancy complications, maternal smoking during pregnancy, maternal alcohol consumption during pregnancy, maternal education attainment, paternal age, paternal education attainment, and place of residence at birth.



Table S4. Proportions of Each Outcome among Children Analyzed and All Children with mothers aged over 25 years included in 2010 Cohort

|                                                                           |           | Analyzed |        | Original 2010 Cohort |        |
|---------------------------------------------------------------------------|-----------|----------|--------|----------------------|--------|
| Hospitalization for any reason                                            | Yes       | 23.5     | %      | 21.2                 | %      |
| Hospitalization for respiratory infection                                 | Yes       | 10.0     | %      | 8.8                  | %      |
| Hospitalization for gastrointestinal disease                              | Yes       | 3.0      | %      | 2.9                  | %      |
| Overweight or obesity at age 5.5 years                                    | Yes       | 9.4      | %      | 10.0                 | %      |
| Overweight or obesity at age 9 years                                      | Yes       | 12.2     | %      | 13.1                 | %      |
|                                                                           |           |          |        |                      |        |
| Motor milestones not attained by the expected time (2.5 years)            | Mean (SD) | 0.09     | (0.48) | 0.05                 | (0.30) |
|                                                                           | 1         | 3.4      | %      | 2.5                  | %      |
|                                                                           | 2         | 0.5      | %      | 0.3                  | %      |
|                                                                           | 3         | 0.7      | %      | 0.2                  | %      |
|                                                                           | 4         | 0.8      | %      | 0.2                  | %      |
| Language milestones not attained by the expected time (2.5 years)         | Mean (SD) | 0.26     | (0.65) | 0.16                 | (0.49) |
|                                                                           | 1         | 9.3      | %      | 8.0                  | %      |
|                                                                           | 2         | 5.2      | %      | 3.1                  | %      |
|                                                                           | 3         | 2.0      | %      | 0.7                  | %      |
| Cognitive milestones not attained by the expected time (5.5 years)        | Mean (SD) | 0.08     | (0.27) | 0.07                 | (0.26) |
|                                                                           | 1         | 8.2      | %      | 7.2                  | %      |
| Social-emotional milestones not attained by the expected time (5.5 years) | Mean (SD) | 0.2      | (0.56) | 0.17                 | (0.49) |
|                                                                           | 1         | 10.8     | %      | 9.7                  | %      |
|                                                                           | 2         | 2.5      | %      | 2.4                  | %      |
|                                                                           | 3         | 1.6      | %      | 0.9                  | %      |
| Self-regulation problem (5.5 years)                                       | Mean (SD) | 0.16     | (0.43) | 0.14                 | (0.40) |
|                                                                           | 1         | 10.0     | %      | 10.2                 | %      |
|                                                                           | 2         | 2.8      | %      | 1.9                  | %      |
| Attention problem (8 years)                                               | Mean (SD) | 0.21     | (0.41) | 0.19                 | (0.39) |
|                                                                           | 1         | 20.9     | %      | 18.8                 | %      |
| Adaptive problem (8 years)                                                | Mean (SD) | 0.41     | (0.65) | 0.38                 | (0.63) |
|                                                                           | 1         | 26.6     | %      | 23.7                 | %      |
|                                                                           | 2         | 6.0      | %      | 5.8                  | %      |
|                                                                           | 3         | 1.0      | %      | 0.8                  | %      |
| Conduct problem (8 years)                                                 | Mean (SD) | 0.46     | (0.74) | 0.43                 | (0.69) |
|                                                                           | 1         | 23.4     | %      | 23.9                 | %      |
|                                                                           | 2         | 7.7      | %      | 7.0                  | %      |
|                                                                           | 3         | 2.3      | %      | 1.5                  | %      |

SD: standardized deviation
